# Supplementary material
Source: Springer Nature journal article supplement (https://www.springermedizin.de/resource/supplementary/12933_2013_791_MOESM2_ESM.pdf/9539222)
Supplement: MOESM2 [file 9539222]

## Risk of ischaemic heart disease

**Hazard /  
Odds ratio**

### **Remnant cholesterol**

Observational: Elevated plasma levels

Causal: Genetically elevated levels

1.37 (1.27-1.47)

2.82 (1.92-4.15)

### **Remnant cholesterol to HDL cholesterol ratio**

Observational: Elevated plasma levels

Causal: Genetically elevated levels

1.23 (1.19-1.27)

2.94 (1.90-4.55)

### **HDL cholesterol**

Observational: Reduced plasma levels

Causal: Genetically reduced levels

1.55 (1.43-1.68)

0.74 (0.40-1.37)

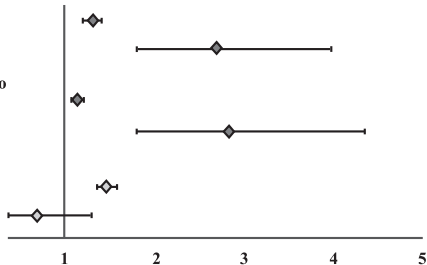

**Hazard / Odds ratio for a 1 mmol/L or ratio increase / decrease (95% CI)**
